# Supplementary material for: Effect of Salmonella Typhimurium Colonization on Microbiota Maturation and Blood Leukocyte Populations in Broiler Chickens
Source: MDPI journal article supplement (doi:10.3390/ani12202867), 2022-10-20
Supplement: s1 [file s1]

Table S1: Relative abundance of the top 20 genera following ST colonization.

| Genus                              | D8      |       | D14     |       |       | D21     |       |       |
|------------------------------------|---------|-------|---------|-------|-------|---------|-------|-------|
|                                    | Control | SA    | Control | SA    | SN    | Control | SA    | SN    |
| Clostridiales_unclassified         | 15.70   | 13.80 | 15.61   | 11.52 | 8.76  | 19.73   | 20.80 | 18.31 |
| Oscillospira                       | 21.65   | 11.76 | 13.40   | 8.37  | 13.08 | 14.22   | 11.74 | 12.19 |
| Ruminococcaceae_unclassified       | 11.09   | 10.23 | 15.70   | 15.39 | 14.18 | 15.54   | 10.53 | 9.75  |
| Butyricicoccus                     | 3.40    | 5.47  | 4.03    | 9.86  | 11.96 | 6.03    | 10.95 | 7.61  |
| Lachnospiraceae_unclassified       | 7.92    | 8.56  | 2.93    | 7.45  | 1.55  | 5.60    | 13.00 | 10.88 |
| Subdoligranulum                    | 14.63   | 8.52  | 0.27    | 14.01 | 0.11  | 0.43    | 7.55  | 1.88  |
| Bacteroides                        | 0.00    | 2.43  | 0.00    | 10.39 | 11.67 | 0.01    | 7.39  | 13.79 |
| Lactobacillus                      | 4.51    | 22.04 | 11.67   | 0.53  | 0.24  | 1.92    | 1.84  | 0.68  |
| Coprobacillus                      | 3.79    | 5.25  | 6.12    | 2.53  | 5.59  | 3.40    | 3.78  | 5.83  |
| Enterococcus                       | 3.04    | 1.45  | 4.52    | 2.98  | 9.08  | 6.56    | 2.01  | 0.90  |
| Escherichia                        | 2.05    | 0.95  | 3.32    | 1.74  | 2.43  | 8.44    | 2.58  | 4.47  |
| Bacillaceae_unclassified           | 0.77    | 3.16  | 9.93    | 6.83  | 0.95  | 1.47    | 1.28  | 0.88  |
| Erysipelatoclostridium             | 3.73    | 5.80  | 1.78    | 1.57  | 3.95  | 3.64    | 1.46  | 1.62  |
| cc_115                             | 2.26    | 1.78  | 3.60    | 4.26  | 4.13  | 1.51    | 1.95  | 0.62  |
| Ruminococcus                       | 1.44    | 0.60  | 2.58    | 0.81  | 2.82  | 2.60    | 2.50  | 3.12  |
| Dorea                              | 0.12    | 0.39  | 0.79    | 0.53  | 7.31  | 2.77    | 1.20  | 2.58  |
| Erysipelotrichaceae_unclassified   | 1.91    | 1.69  | 2.74    | 1.70  | 2.87  | 1.57    | 1.45  | 1.74  |
| Turicibacter                       | 0.04    | 0.00  | 2.86    | 0.01  | 0.09  | 2.72    | 0.02  | 0.07  |
| RF39_unclassified                  | 0.74    | 0.10  | 0.38    | 0.49  | 2.00  | 0.35    | 0.34  | 0.84  |
| Enterobacteriaceae_unclassified    | 0.51    | 0.01  | 0.11    | 0.75  | 0.07  | 0.00    | 0.68  | 0.91  |
| Anaeroplasma                       | 0.00    | 0.00  | 0.68    | 0.00  | 0.37  | 0.35    | 0.34  | 0.91  |
| Christensenellaceae_unclassified   | 0.50    | 0.09  | 0.30    | 0.07  | 0.17  | 0.48    | 0.10  | 0.26  |
| Coprococcus                        | 0.24    | 0.15  | 0.20    | 0.04  | 0.36  | 0.13    | 0.48  | 0.33  |
| Clostridium                        | 0.02    | 0.12  | 0.07    | 0.05  | 0.40  | 0.12    | 0.21  | 0.12  |
| Mogibacteriaceae_unclassified      | 0.08    | 0.00  | 0.21    | 0.09  | 0.13  | 0.19    | 0.14  | 0.21  |
| Lachnospira                        | 0.09    | 0.06  | 0.17    | 0.13  | 0.24  | 0.13    | 0.03  | 0.12  |
| ML615J-28_unclassified             | 0.00    | 0.00  | 0.83    | 0.00  | 0.00  | 0.00    | 0.00  | 0.00  |
| Dehalobacteriaceae_unclassified    | 0.00    | 0.00  | 0.07    | 0.00  | 0.03  | 0.12    | 0.35  | 0.05  |
| Blautia                            | 0.16    | 0.00  | 0.01    | 0.06  | 0.12  | 0.04    | 0.05  | 0.11  |
| Proteus                            | 0.00    | 0.16  | 0.02    | 0.10  | 0.03  | 0.03    | 0.06  | 0.09  |
| rc4-4                              | 0.00    | 0.00  | 0.00    | 0.00  | 0.00  | 0.48    | 0.00  | 0.00  |
| Enterobacter                       | 0.00    | 0.00  | 0.00    | 0.00  | 0.11  | 0.00    | 0.22  | 0.06  |
| Faecalibacterium                   | 0.00    | 0.02  | 0.07    | 0.07  | 0.04  | 0.07    | 0.04  | 0.05  |
| Holdemania                         | 0.05    | 0.00  | 0.04    | 0.00  | 0.08  | 0.02    | 0.09  | 0.06  |
| Pediococcus                        | 0.05    | 0.02  | 0.11    | 0.00  | 0.10  | 0.00    | 0.00  | 0.00  |
| [Eubacterium]                      | 0.02    | 0.00  | 0.19    | 0.00  | 0.04  | 0.00    | 0.00  | 0.00  |
| Klebsiella                         | 0.00    | 0.02  | 0.03    | 0.04  | 0.03  | 0.01    | 0.00  | 0.04  |
| Salmonella                         | 0.00    | 0.11  | 0.00    | 0.04  | 0.00  | 0.00    | 0.00  | 0.00  |
| [Ruminococcus]                     | 0.00    | 0.02  | 0.00    | 0.01  | 0.00  | 0.04    | 0.05  | 0.00  |
| SHA-98_unclassified                | 0.00    | 0.00  | 0.06    | 0.00  | 0.00  | 0.06    | 0.00  | 0.00  |
| Bacteria_unclassified              | 0.00    | 0.00  | 0.00    | 0.06  | 0.03  | 0.00    | 0.01  | 0.00  |
| Peptostreptococcaceae_unclassified | 0.00    | 0.00  | 0.06    | 0.00  | 0.00  | 0.01    | 0.02  | 0.00  |
| Shigella                           | 0.03    | 0.00  | 0.04    | 0.00  | 0.00  | 0.00    | 0.00  | 0.00  |
| EtOH8_unclassified                 | 0.00    | 0.00  | 0.00    | 0.00  | 0.00  | 0.07    | 0.00  | 0.00  |

|                              |      |      |      |      |      |      |      |      |
|------------------------------|------|------|------|------|------|------|------|------|
| Weissella                    | 0.01 | 0.02 | 0.03 | 0.01 | 0.00 | 0.00 | 0.00 | 0.00 |
| Clostridiaceae_unclassified  | 0.00 | 0.00 | 0.02 | 0.00 | 0.04 | 0.00 | 0.00 | 0.00 |
| Firmicutes_unclassified      | 0.00 | 0.00 | 0.04 | 0.00 | 0.00 | 0.00 | 0.00 | 0.01 |
| Staphylococcus               | 0.00 | 0.00 | 0.01 | 0.01 | 0.00 | 0.01 | 0.00 | 0.00 |
| Enterococcaceae_unclassified | 0.00 | 0.00 | 0.00 | 0.00 | 0.00 | 0.02 | 0.00 | 0.00 |

\*Data is shown as percent relative abundance of normalized data.
